# Supplementary material for: Standardization of whole blood immune phenotype monitoring for clinical trials: panels and methods from the ONE study
Source: PubMed Central journal article supplement (PMC3827923; doi:10.1186/2047-1440-2-17), 2013-10-25
Supplement: 2047-1440-2-17-S2.pdf [file 2047-1440-2-17-S2.pdf]

**Instruments**

NAVIOS, Beckman Coulter  
 KALUZA analysis software, Beckman Coulter  
 Centrifuge  
 Vortexer  
 Refrigerator  
 Pipettes  
 Pipette boy

**Materials**

Pipette tips (5 µl - 1000 µl) for low volume (µl) pipettes  
 Pipette tips for pipette boy  
 12x75mm-Flow cytometry tubes  
 Rack for 12x75mm-tubes

| Name                                                                | Company         | Order no.    |
|---------------------------------------------------------------------|-----------------|--------------|
| IsoFlow™                                                            | Beckman Coulter | 8546859      |
| Versa Lyse™ – Lysing solution                                       | Beckman Coulter | A09777       |
| IOtest® 3 Fixative solution (10x)                                   | Beckman Coulter | A07800       |
| Test tube, 12 x 75 mm Blue, 250 pieces                              | Beckman Coulter | 2523749      |
| FCS – head inactivated<br>or an other comparable commercial product | Biochrom        | S0115        |
| NaN <sub>3</sub><br>or an other comparable commercial product       | Merck           | 1.06549.0100 |

**Working solutions / buffer**

|                            |                                                            |
|----------------------------|------------------------------------------------------------|
| PBS/FCS-buffer             | IsoFlow + 0,1% NaN <sub>3</sub> + 2 % FCS                  |
| 1x Versa Lyse-Fix-solution | 10 ml Versa-Lyse + 250 µl IOtest 3 Fixative solution (10x) |

**Antibodies and pipetting volumes**

| Antibody Panel | Company         | Volume per test                              |
|----------------|-----------------|----------------------------------------------|
| BM01           | Beckman Coulter | 40 µl (20µl vial1 + 10µl vial2 + 10µl vial3) |
| BM02           | Beckman Coulter | 40 µl (20µl vial1 + 10µl vial2 + 10µl vial3) |
| BM03           | Beckman Coulter | 40 µl (20µl vial1 + 10µl vial2 + 10µl vial3) |
| BM04           | Beckman Coulter | 40 µl (20µl vial1 + 10µl vial2 + 10µl vial3) |
| BM06           | Beckman Coulter | 40 µl (20µl vial1 + 10µl vial2 + 10µl vial3) |

**Material for analysis**

|                           |                                                                  |
|---------------------------|------------------------------------------------------------------|
| <b>Material</b>           | EDTA whole blood                                                 |
| <b>Storing conditions</b> | transport at room temperature, storing in the laboratory at 4 °C |
| <b>Storage times</b>      | max. 4h after blood collection, max 12h after end of staining    |

**Sample preparation**

01. EDTA-whole blood store within refrigerator, mix well prior to use
02. Label four 5ml flow cytometry tubes with „ONE 01 to ONE 04“ and patient ID
03. Label two 5ml flow cytometry tubes with “ONE 06” and patient ID
04. Add 100 µl EDTA-blood per tube

**Surface staining**

05. Add antibody mixes according to label on tube
06. Vortex for 10 s
07. Incubate for 15 min, RT (room temperature), in the dark
08. Vortex for 10 s
09. Add 1,5 ml 1x Versa-Lyse-Fix-solution to all tubes
10. Vortex briefly
11. Incubate for 15 min, RT (room temperature), in the dark
12. Vortex for 5 s
13. Add 2,5 ml cold PBS/FCS-buffer to all tubes
14. Centrifuge, 300 g, 5 min, 4 °C
15. Decant
16. Vortex for 5 s
17. Add cell suspension from one tube “ONE 06” to the second tube “ONE 06”
18. Add 3 ml PBS/FCS to all tubes
19. Centrifuge, 300 g, 5 min, 4 °C
20. Decant
21. Vortex for 5 s
22. Add 150 µl PBS/FCS-buffer (resulting in final volume about 250 µl)

*Store at 4 °C in the dark until measurement*

**Setting information for NAVIOS cytometer**

|                  |      |                                          |
|------------------|------|------------------------------------------|
| <b>Protocol:</b> | BM01 | (for the stained blood sample tube BM01) |
|                  | BM02 | (for the stained blood sample tube BM02) |
|                  | BM03 | (for the stained blood sample tube BM03) |
|                  | BM04 | (for the stained blood sample tube BM04) |
|                  | BM05 | (for the stained blood sample tube BM05) |

**Cytosettings:** ONE study Panel 01\_2012 settings (for all tubes)

**Sample designation:** ID1: Donor ID  
 ID2: Study  
 ID3: Panel  
 ID4: Analyst (three letter code: 1<sup>st</sup> letter “name” + 1<sup>st</sup> & 2<sup>nd</sup> letter “last name”)

Example: R5001V01\_ONE-Study\_BM01\_MST

**Supplemental Material**

TDS VersaLyse Beckman Coulter  
 TDS IOTest3 Fixative Solution Beckman Coulter  
 TDS IsoFlow Beckman Coulter
