# Supplementary material for: Standardization of whole blood immune phenotype monitoring for clinical trials: panels and methods from the ONE study
Source: PubMed Central journal article supplement (PMC3827923; doi:10.1186/2047-1440-2-17), 2013-10-25
Supplement: 2047-1440-2-17-S3.pdf [file 2047-1440-2-17-S3.pdf]

**Instruments**

NAVIOS, Beckman Coulter  
 KALUZA analysis software, Beckman Coulter  
 Centrifuge  
 Vortexer  
 Test tube rotator  
 Refrigerator  
 Pipettes  
 Pipette boy

**Material**

Pipette tips (5 µl - 1000 µl) for low volume (µl) pipettes  
 Pipette tips for pipette boy  
 50 ml centrifuge tubes (e. g. Falcon™)  
 12x75mm-flow cytometry tubes  
 Rack for 12x75mm-tubes and 50 ml tubes

| Name                                                                    | Company                     | Order no.             |
|-------------------------------------------------------------------------|-----------------------------|-----------------------|
| IsoFlow™                                                                | Beckman Coulter             | 8546859               |
| Red Blood Cell Lysis Solution (10X)<br>or Lysing Solution IOTest3 (10X) | Miltenyi<br>Beckman Coulter | 130-094-183<br>A07799 |
| IOTest 3 Fixative Solution (10X)                                        | Beckman Coulter             | A07800                |
| Test Tube, 12x75mm Blue, 250 pieces                                     | Beckman Coulter             | 2523749               |
| FCS – head inactivated<br>or an other comparable commercial product     | Biochrom                    | S0115                 |
| NaN <sub>3</sub><br>or an other comparable commercial product           | Merck                       | 1.06549.0100          |
| Ampuwa<br>or an other comparable commercial product                     | Fresenius Kabi              |                       |

**Working solutions / buffer**

|                 |                                                                                                                          |
|-----------------|--------------------------------------------------------------------------------------------------------------------------|
| PBS/FCS-buffer  | IsoFlow + 0,1% NaN <sub>3</sub> + 2 % FCS                                                                                |
| 1X Lysis-buffer | 1,5 ml Red Blood Cell Lysing Solution (10x) + 13,5 ml Ampuwa<br>or 1,5 ml Lysing Solution IOTest3 (10x) + 13,5 ml Ampuwa |
| PBS-Fix-buffer  | 1ml IsoFlow + 25 µl IOTest 3 Fixative Solution (10x)                                                                     |

**Antibodies and pipetting volumes**

| Antibody Panel | Company         | Volume per test                              |
|----------------|-----------------|----------------------------------------------|
| BM05           | Beckman Coulter | 40 µl (20µl vial1 + 10µl vial2 + 10µl vial3) |

**Material for analysis**

|                           |                                                                  |
|---------------------------|------------------------------------------------------------------|
| <b>Material</b>           | EDTA whole blood                                                 |
| <b>Storing conditions</b> | Transport at room temperature, storing in the laboratory at 4 °C |
| <b>Storage times</b>      | Max. 4h after blood collection, max 12h after end of staining    |

*Please note: Problems with the lysis of the blood sample can follow an incomplete load of the EDTA blood collection tube with whole blood during the blood sampling procedure!!*

**Sample preparation**

01. EDTA-whole blood store within refrigerator, mix well prior to use
02. Label two 5ml flow cytometry tubes with „ONE 05“ and patient ID
03. Label one 50 ml Falcon™ tube with patient ID
04. Add 15 ml 1X Lysis-buffer into the 50 ml Falcon™-tube
05. Inject 300 µl whole blood
06. Vortex
07. Incubate for 12 min, at RT (room temperature) on test tube rotator
08. Add 10 ml cold IsoFlow
09. Centrifuge, 300g, 10 min, 4 °C
10. Decant supernatant
11. Resuspend pellet
12. Add 300 µl cold IsoFlow
13. Transfer the suspension into one of the 5 ml-flow cytometry tubes
14. Add 4 ml cold IsoFlow
15. Centrifuge, 300g, 5 min, 4 °C
16. Decant supernatant
17. Resuspend pellets in rest volume
18. Transfer 100 µl cell suspension to the second labelled flow cytometry tube (If there is less volume then 100 µl volume adjust by adding IsoFlow buffer)

***Please note: In case of an incomplete lysis of the whole blood sample (dark-red cell pellet) please repeat!! An incomplete lysed sample is not stainable!***

**Surface staining**

19. Add antibody mixes according to label on the tube
20. Vortex for 10 s
21. Incubate 20 min, 4 °C, in the dark
22. Vortex for 10 s
23. Add 1 ml PBS-Fix buffer
24. Vortex briefly
25. Incubate 10 min, RT (room temperature), in the dark
26. Vortex for 5 s
27. Add 2 ml cold PBS/FCS-buffer
28. Centrifuge at 300 g, 5 min, 4 °C
29. Decant supernatant
30. Vortex for 5 s
31. Add 150 µl PBS/FCS-buffer (resulting in final volume 250 µl)

*Store at 4 °C in the dark until measurement*

**Setting information for NAVIOS cytometer**

**Protocol:** BM05 (for the stained blood sample tube BM05)

**Cytosettings:** ONE study Panel 05\_2012 settings

**Sample designation:** ID1: Donor ID  
ID2: Study  
ID3: Panel  
ID4: Analyst (three letter code: 1<sup>st</sup> letter “name” + 1<sup>st</sup> & 2<sup>nd</sup> letter “last name”)

Example: R5001V01\_ONE-Study\_BM05\_MST

**Supplemental Material**

TDS IOTest3 Fixative Solution Beckman Coulter  
TDS Lysing Solution IOTest3 10X Beckman Coulter  
TDS Red Blood Cell Lysis 10X Miltenyi  
TDS IsoFlow Beckman Coulter
