# Supplementary material for: Standardization of whole blood immune phenotype monitoring for clinical trials: panels and methods from the ONE study
Source: PubMed Central journal article supplement (PMC3827923; doi:10.1186/2047-1440-2-17), 2013-10-25

Supplementary  
Figure 2

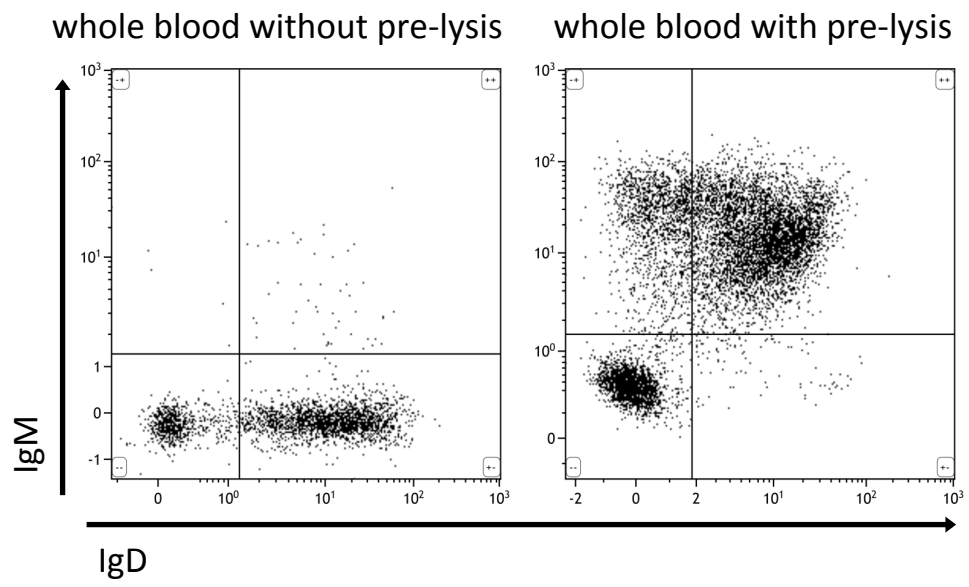

Supplement: 2047-1440-2-17-S4.pdf [file 2047-1440-2-17-S4.pdf]
