# Supplementary material for: Standardization of whole blood immune phenotype monitoring for clinical trials: panels and methods from the ONE study
Source: Transplant Res. 2013 Oct 25;2:17. doi: 10.1186/2047-1440-2-17 (PMC3827923; doi:10.1186/2047-1440-2-17)
Supplement: Additional file 1: Figure S1 — Panel matrix for flow cytometry-based immune monitoring within the ONE Study. Listed are all antibodies with clone ID and fluorochrome conjugate. [file 2047-1440-2-17-S1.pdf]

## Supplementary Figure 1

[illegible]
