# Supplementary material for: Standardization of whole blood immune phenotype monitoring for clinical trials: panels and methods from the ONE study
Source: Transplant Res. 2013 Oct 25;2:17. doi: 10.1186/2047-1440-2-17 (PMC3827923; doi:10.1186/2047-1440-2-17)
Supplement: Additional file 7: Figure S5 — Shown are all results for the validation of the flow cytometry immune monitoring for the ONE Study, including all single CVs and mean CVs, respectively, and all changes from baseline and mean changes from baseline for all test assays. [file 2047-1440-2-17-S7.pdf]

### Supplementary Figure 5

[illegible]
